# Supplementary material for: Hydrogen Sulfide Alleviates Cadmium-Induced Cell Death through Restraining ROS Accumulation in Roots ofBrassica rapaL. ssp.pekinensis
Source: Hindawi journal article supplement (doi:10.1155/2015/804603), 2015-01-01
Supplement: f1 [file 804603.f1.pdf]

## Supplemental materials

**Table S1.** List of all genes for qRT-PCR in the manuscript

| Gene          | Accession number | Primer pairs                 |
|---------------|------------------|------------------------------|
| <i>ACTIN2</i> | Bra022356        | 5' TCAGGTGTCCCGAGGTTCT 3'    |
|               |                  | 5' TACTCATCCTATCAGCAATCCC 3' |
| <i>LCD</i>    | Bra003488        | 5' AAGGTAGAGCGAACGGTAGAAC 3' |
|               |                  | 5' CTCACATAGTAATCAGCACCAA 3' |
| <i>DCD1</i>   | Bra025184        | 5' AAGAGTTTACCAGGCAGTT3'     |
|               |                  | 5' GCAAGACCAAACATCCC 3'      |
| <i>DES1</i>   | Bra036115        | 5' GGAGAACCAGGTCCACATT 3'    |
|               |                  | 5' TTCCACCAATAATCCTTC 3'     |
